# Supplementary material for: PRMT1-mediated PGK1 arginine methylation promotes colorectal cancer glycolysis and tumorigenesis
Source: PubMed Central journal article supplement (PMC10894231; doi:10.1038/s41419-024-06544-6), 2024-02-24
Supplement: 41419_2024_6544_MOESM8_ESM.pdf [file 41419_2024_6544_MOESM8_ESM.pdf]

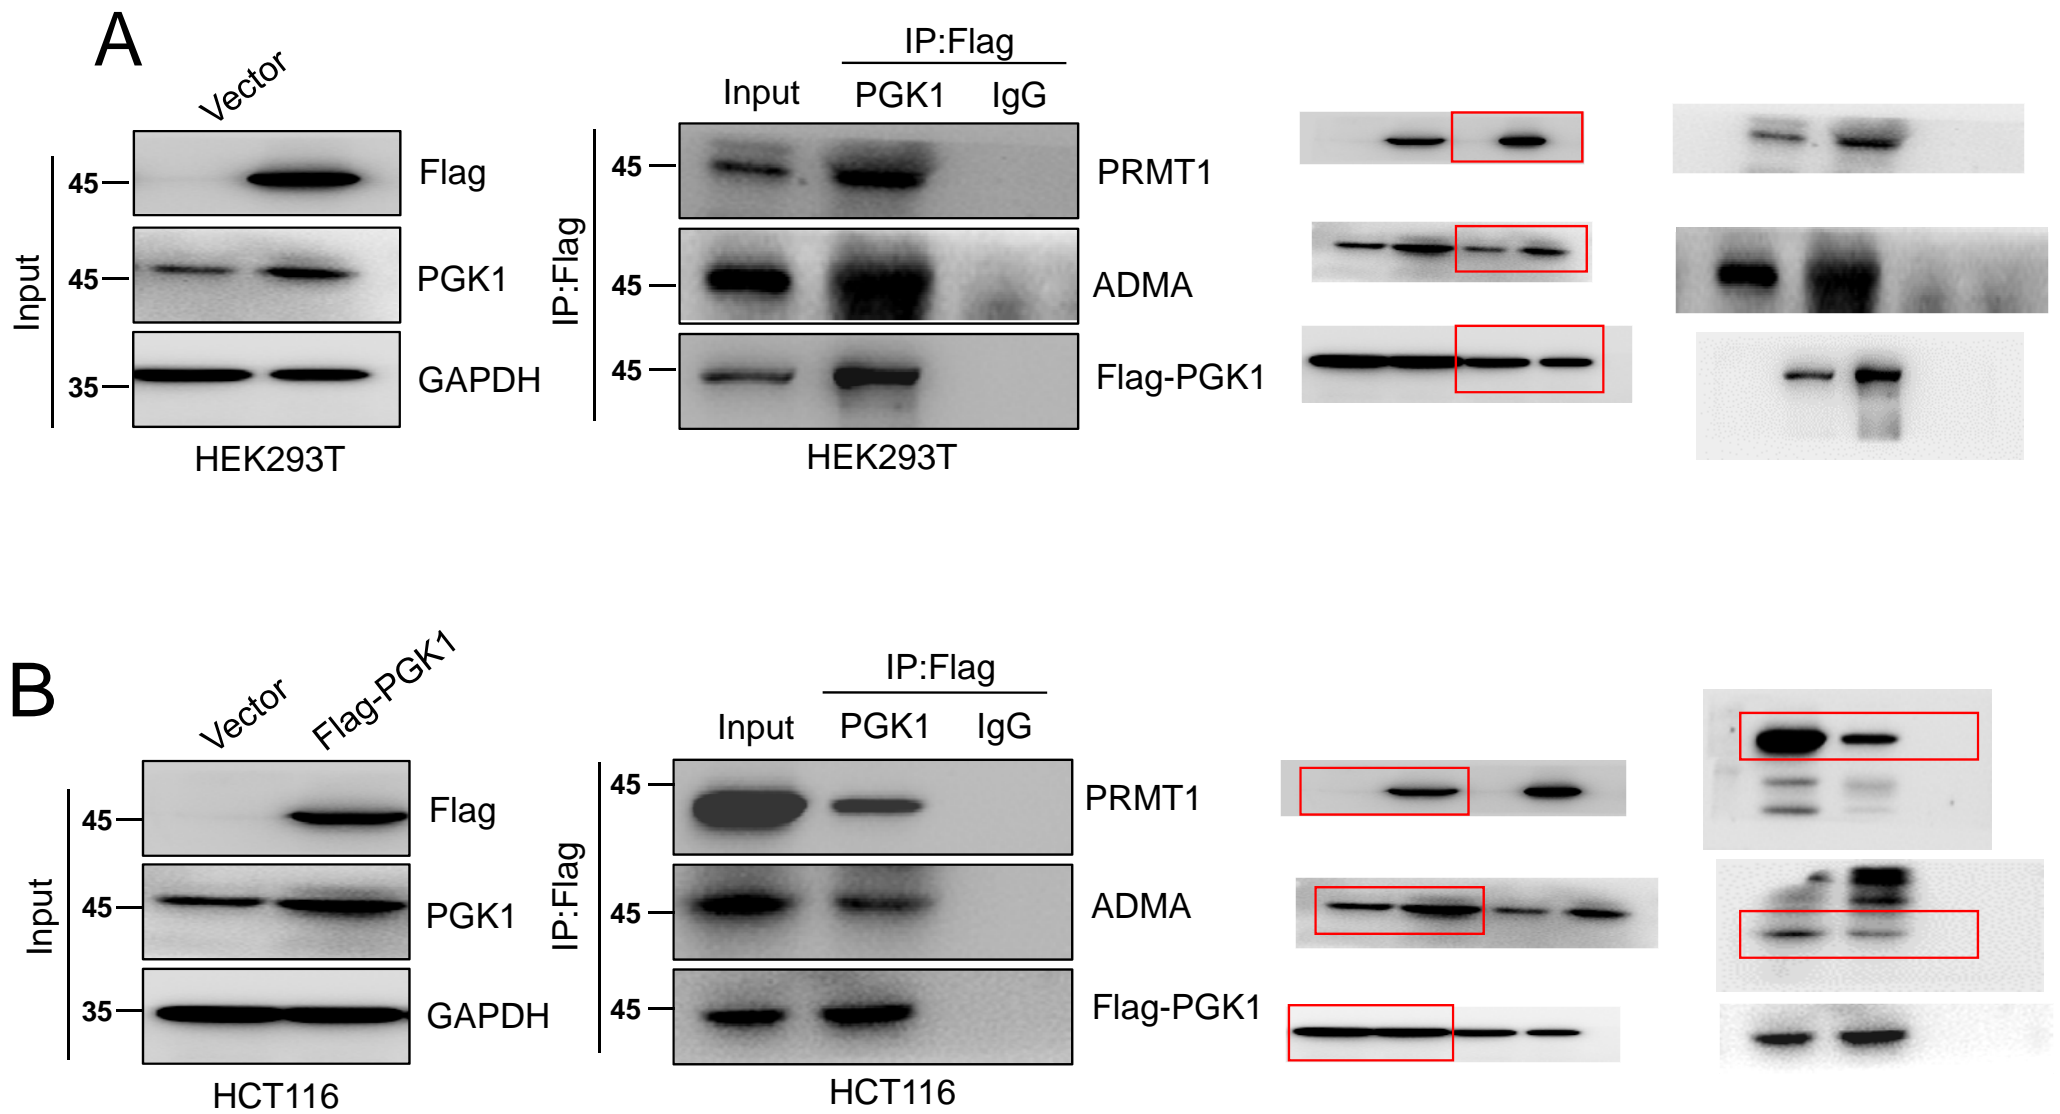

Figure 2

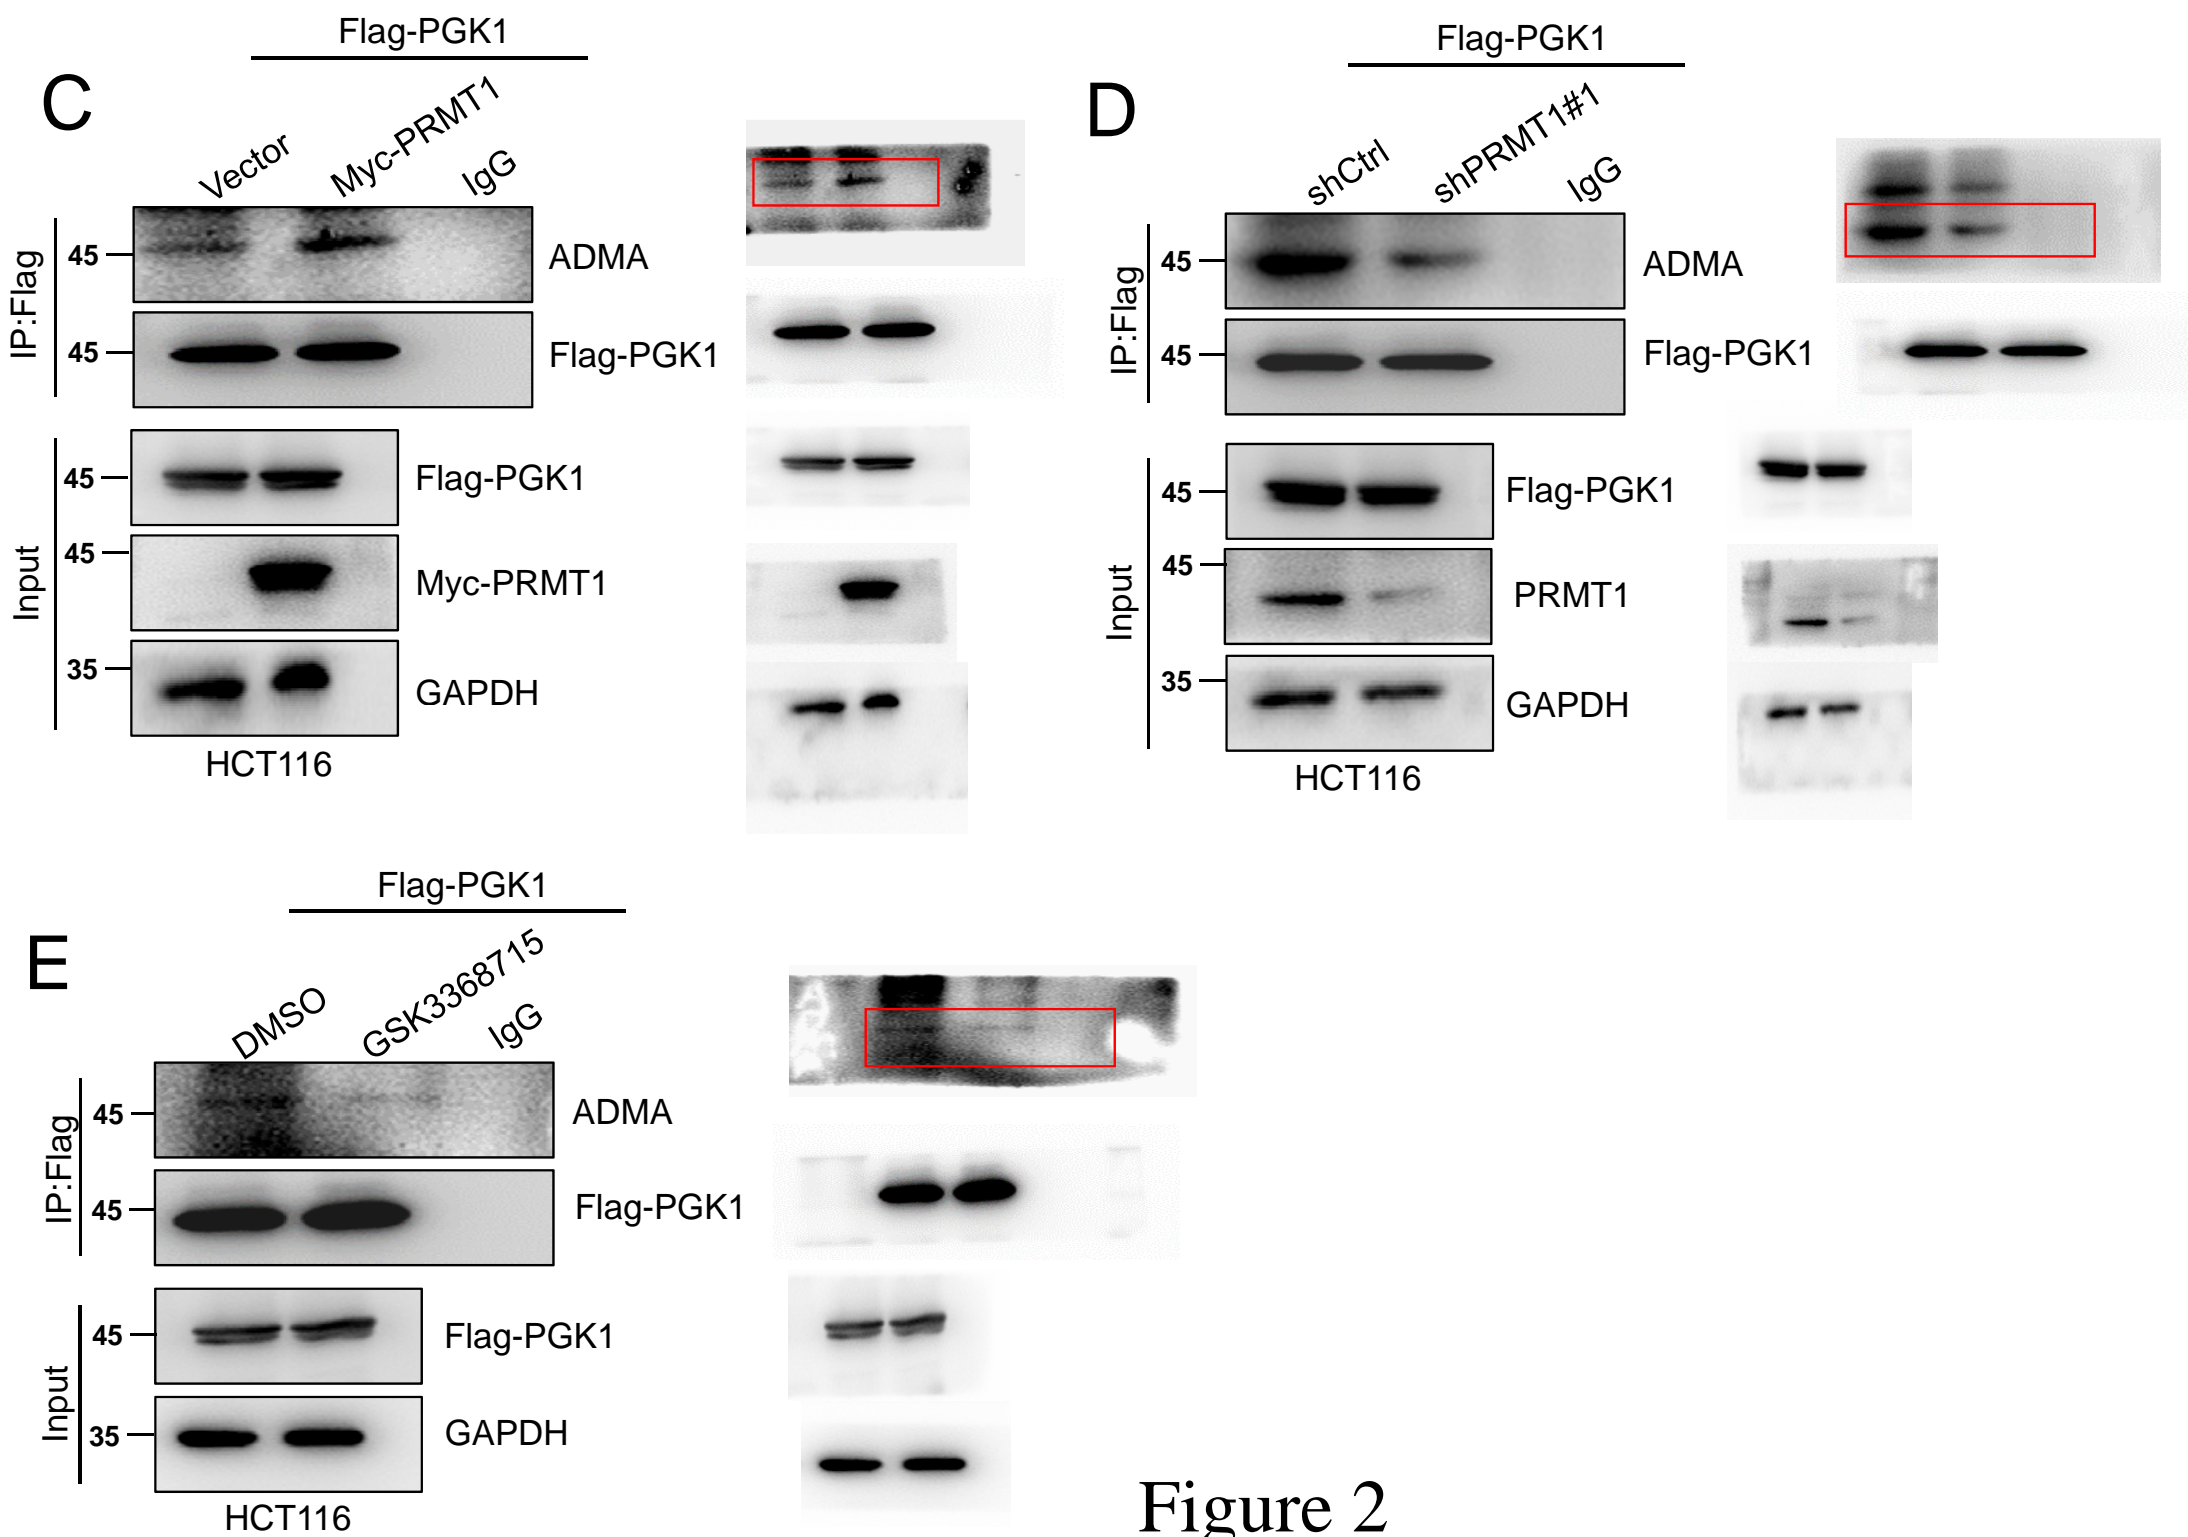

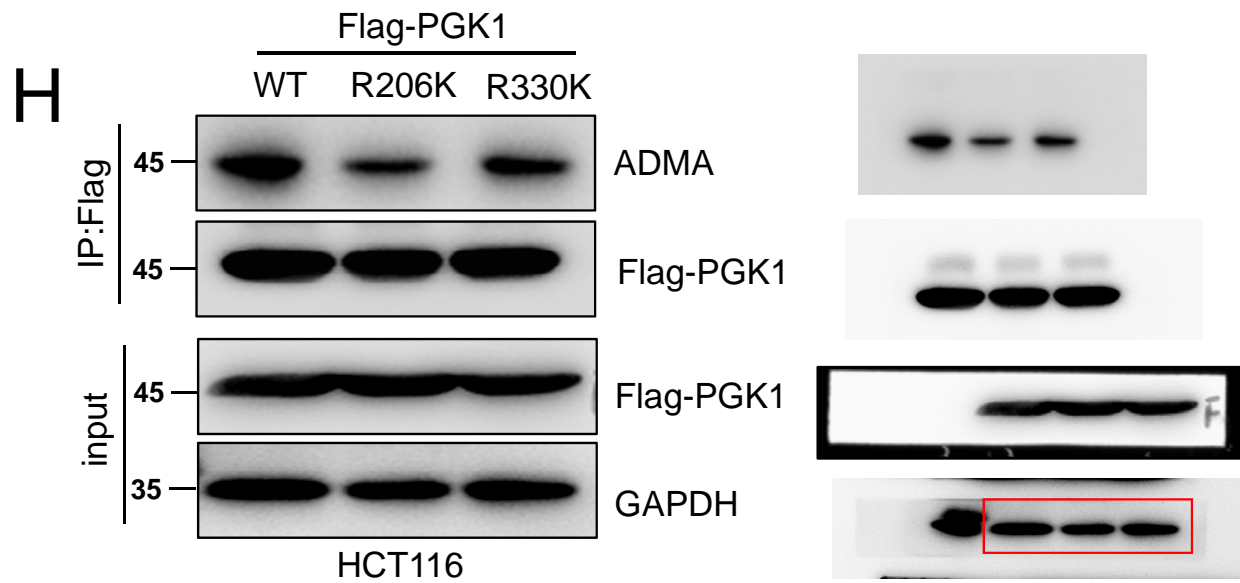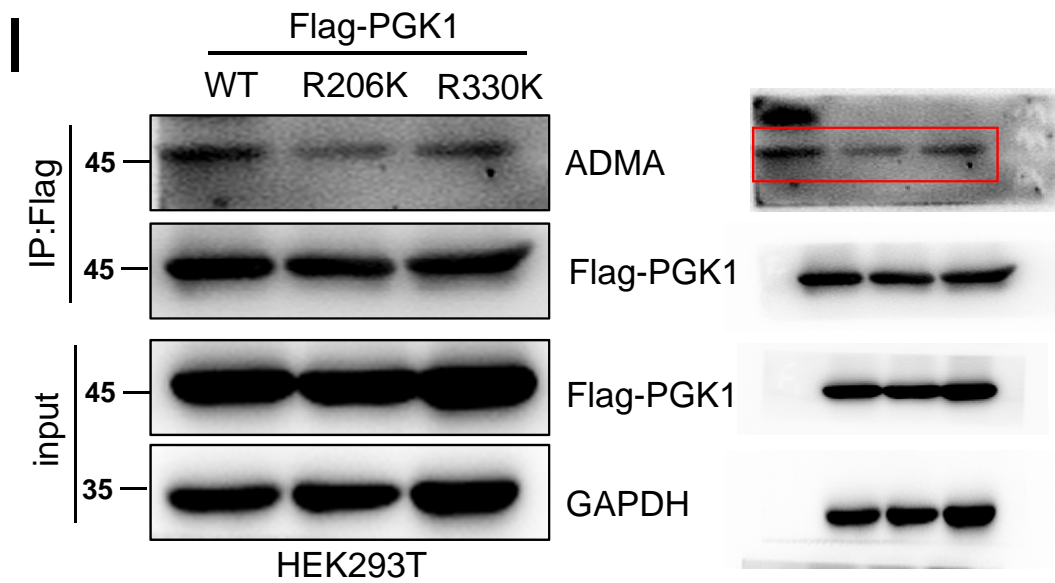

Figure 2

**B**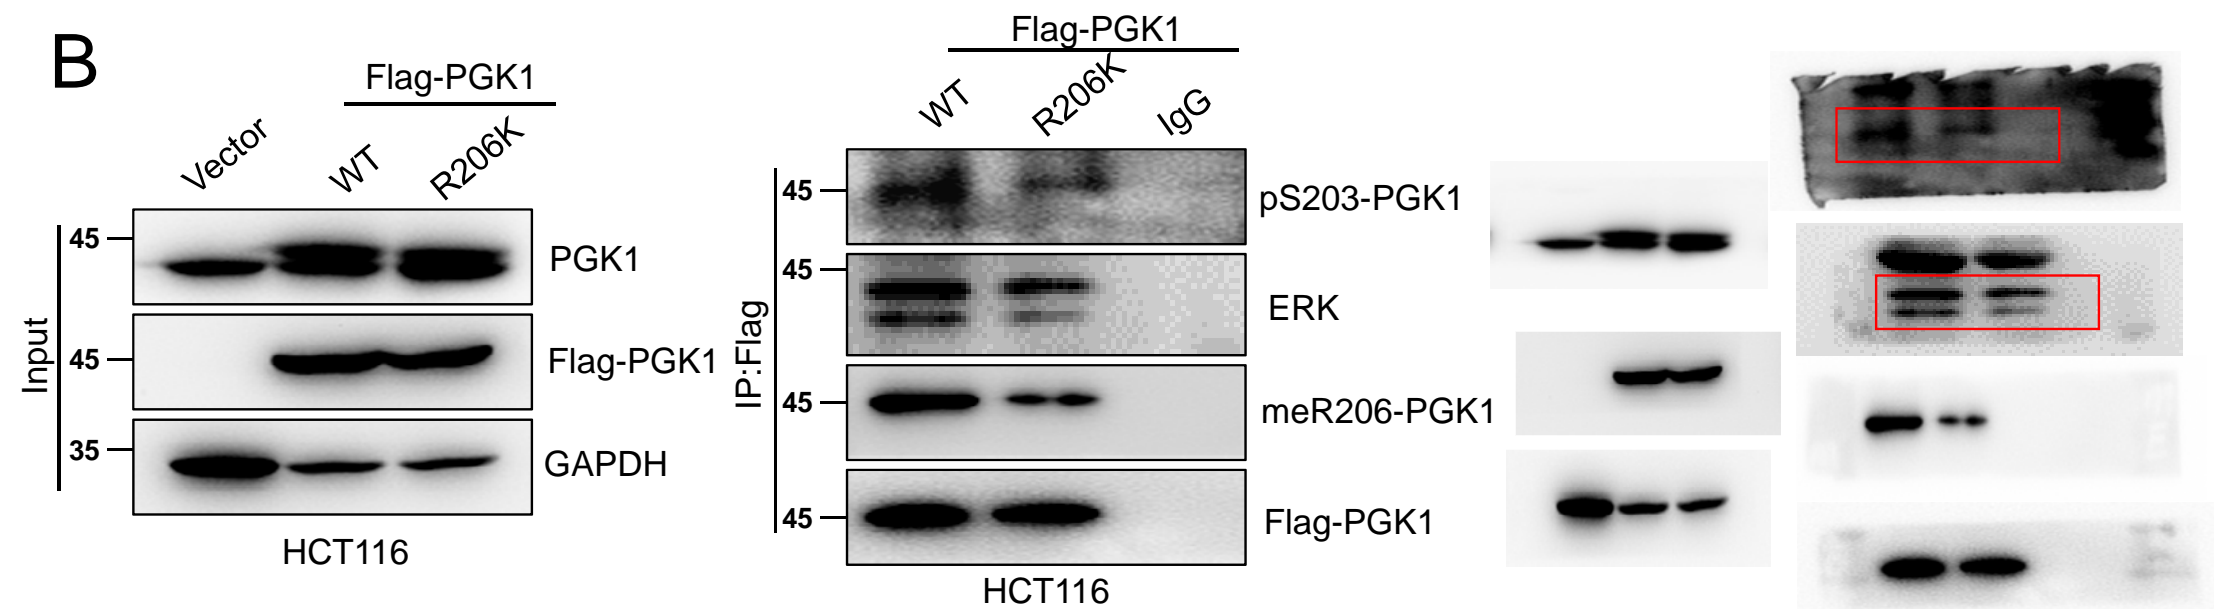**C**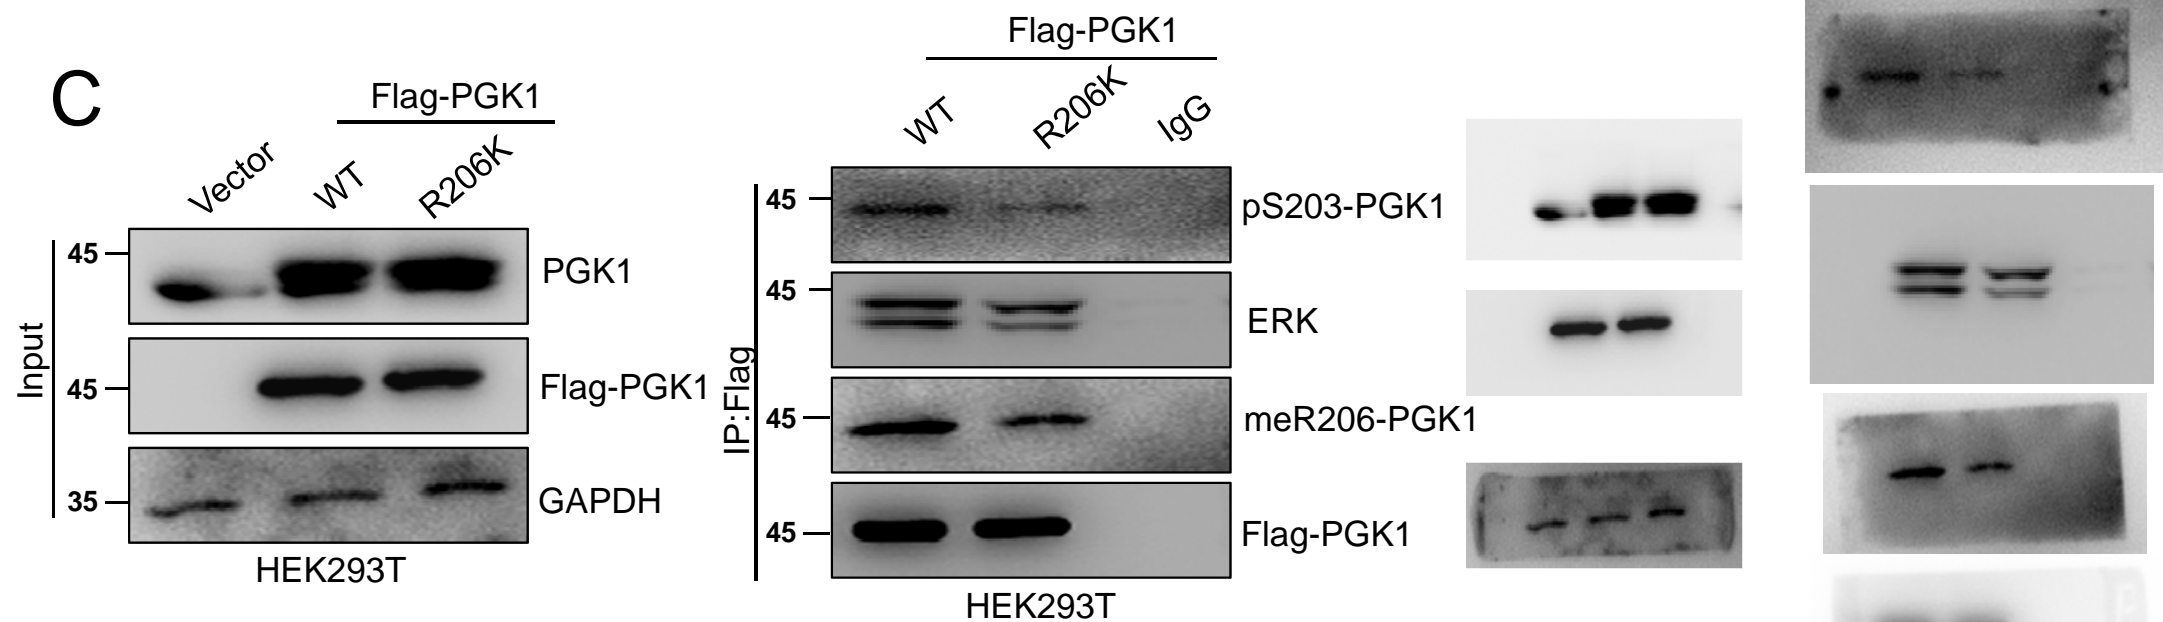**Figure 3**

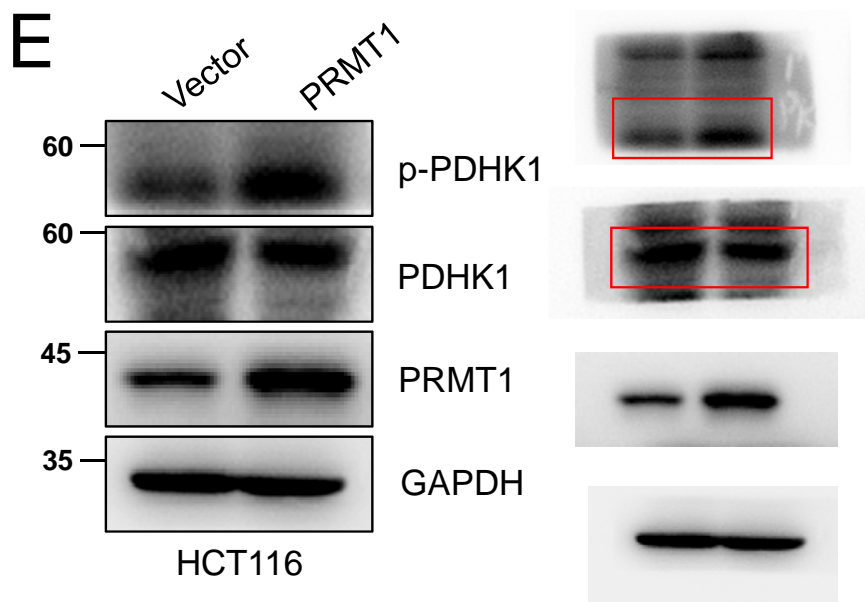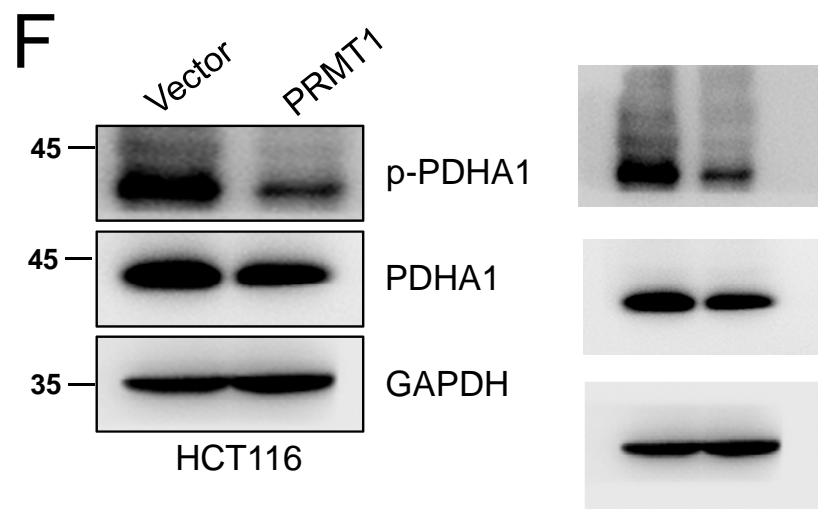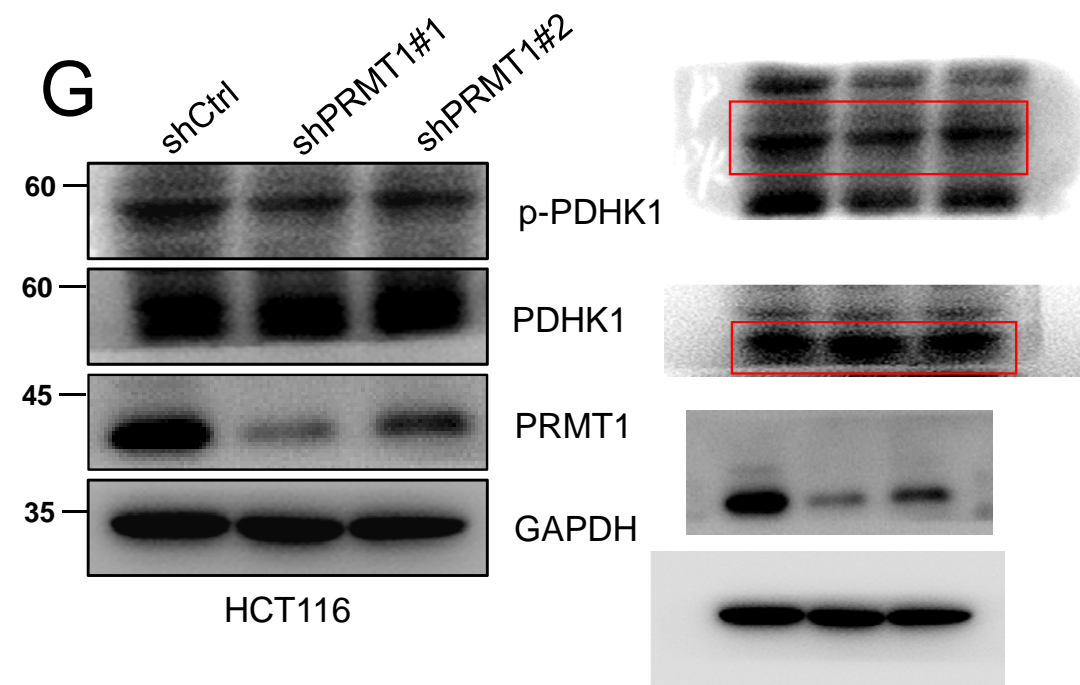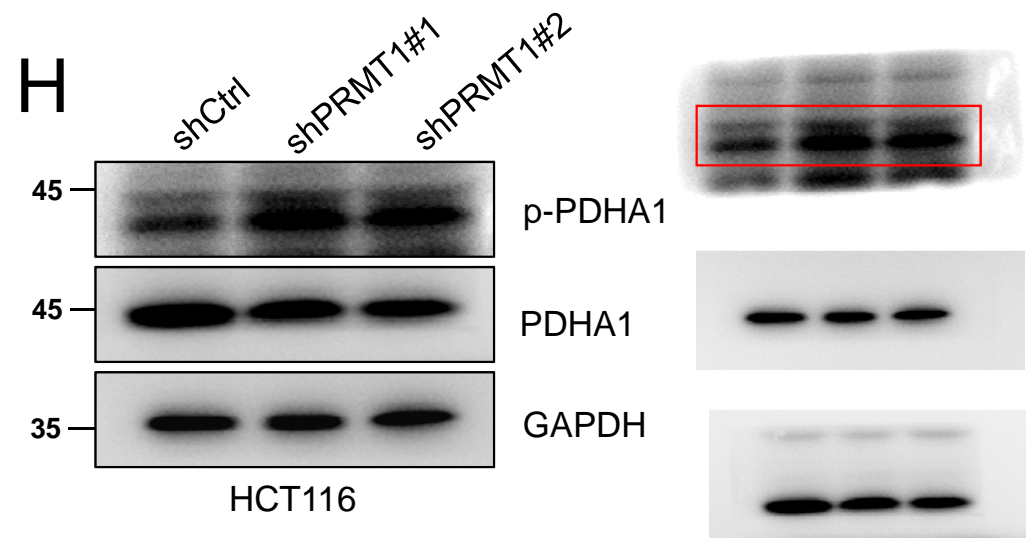

Figure 4

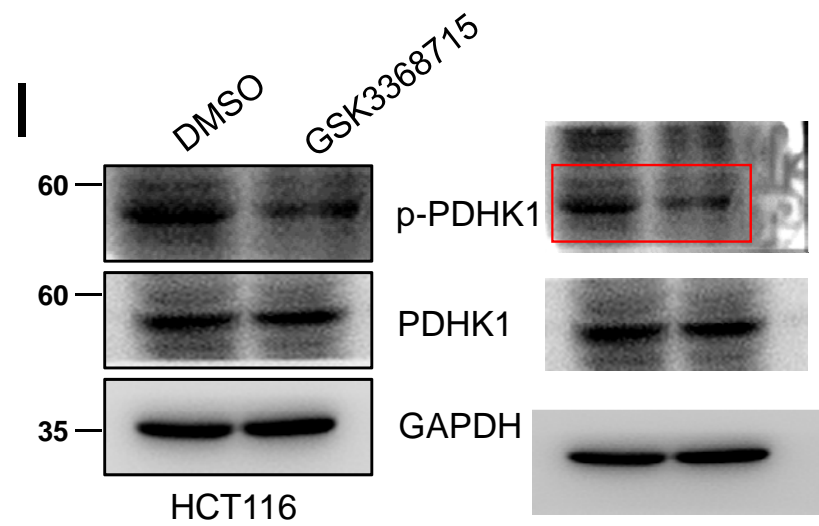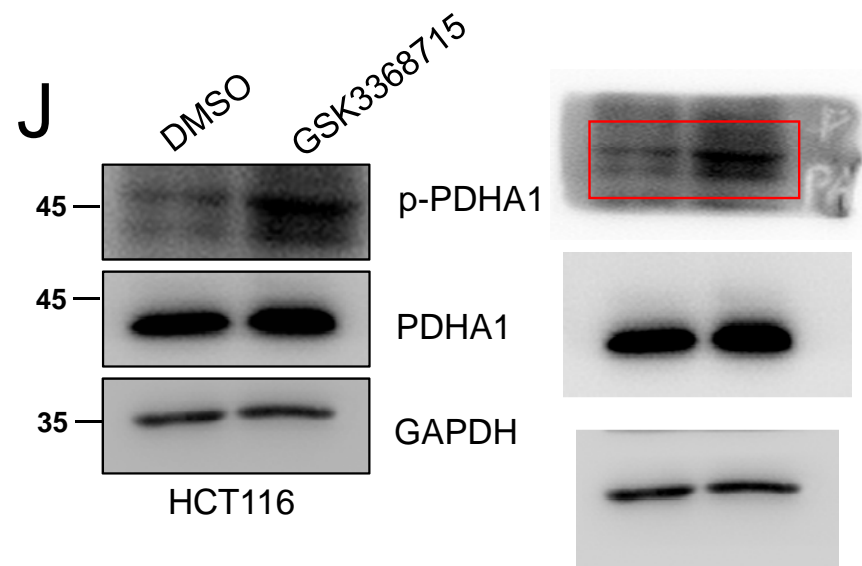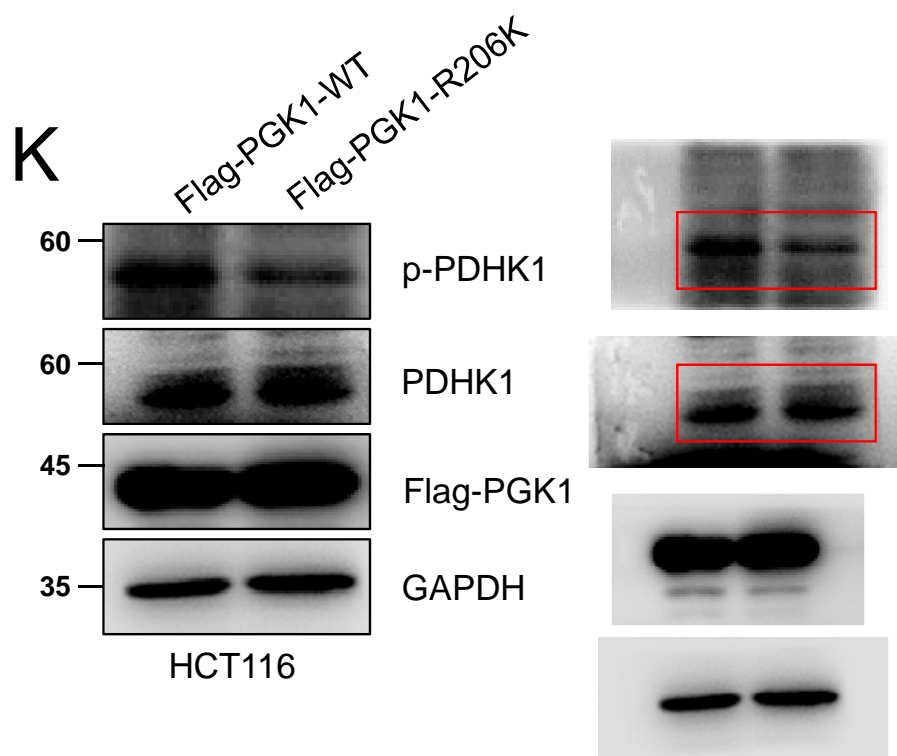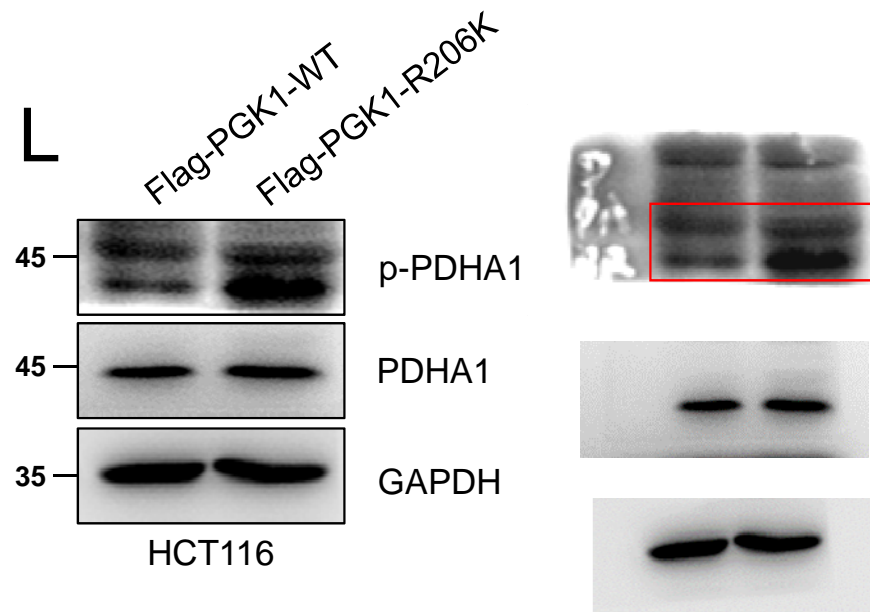

Figure 4



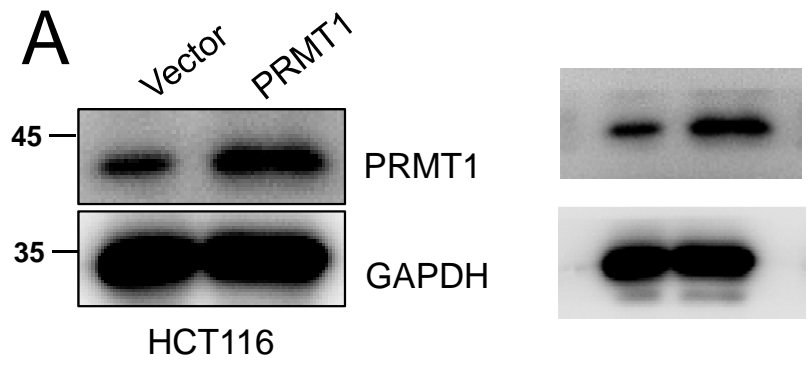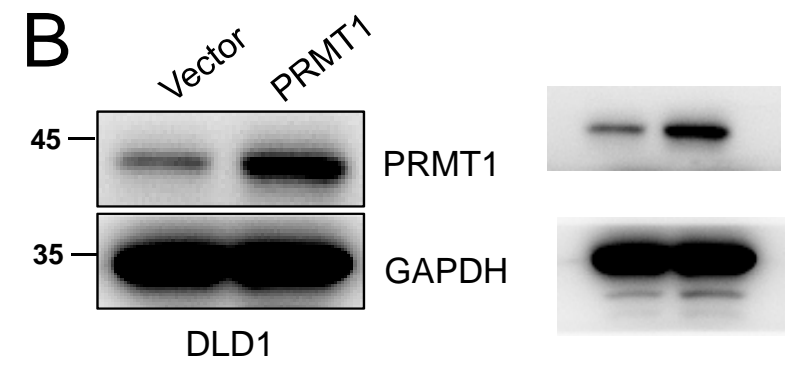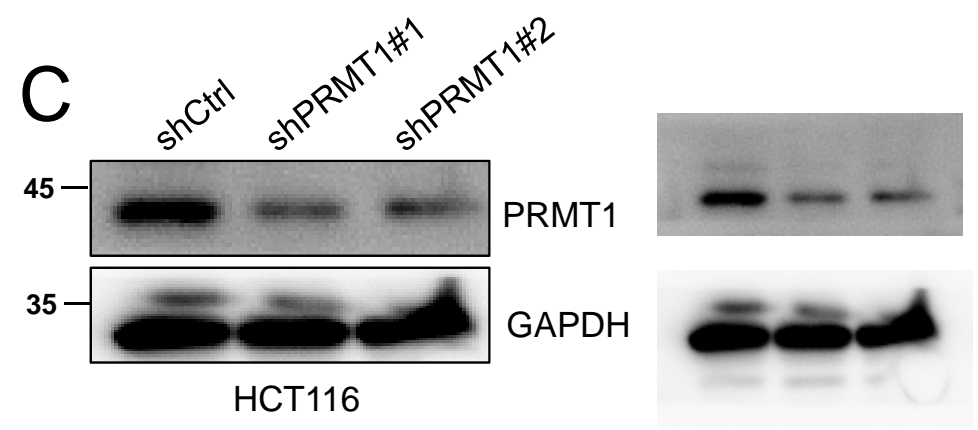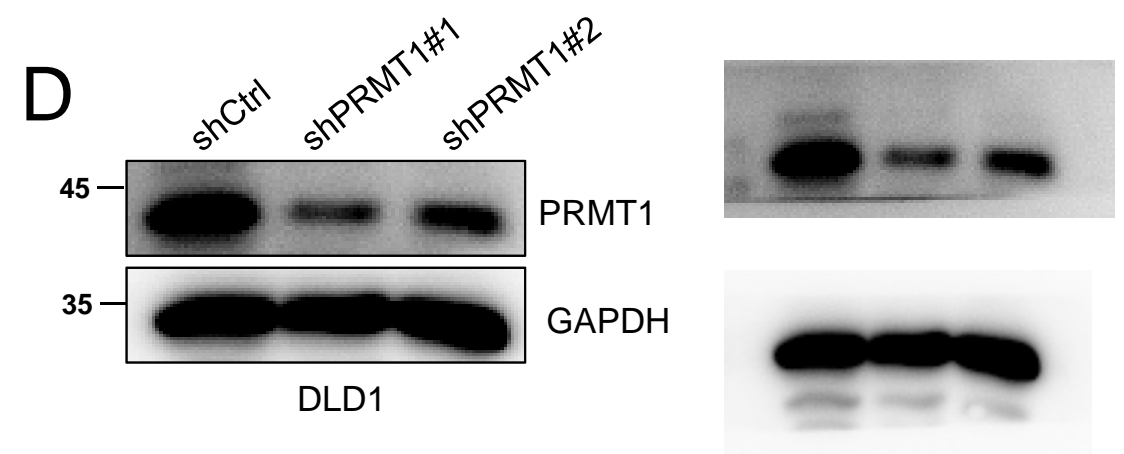

Supplementary Figure 1

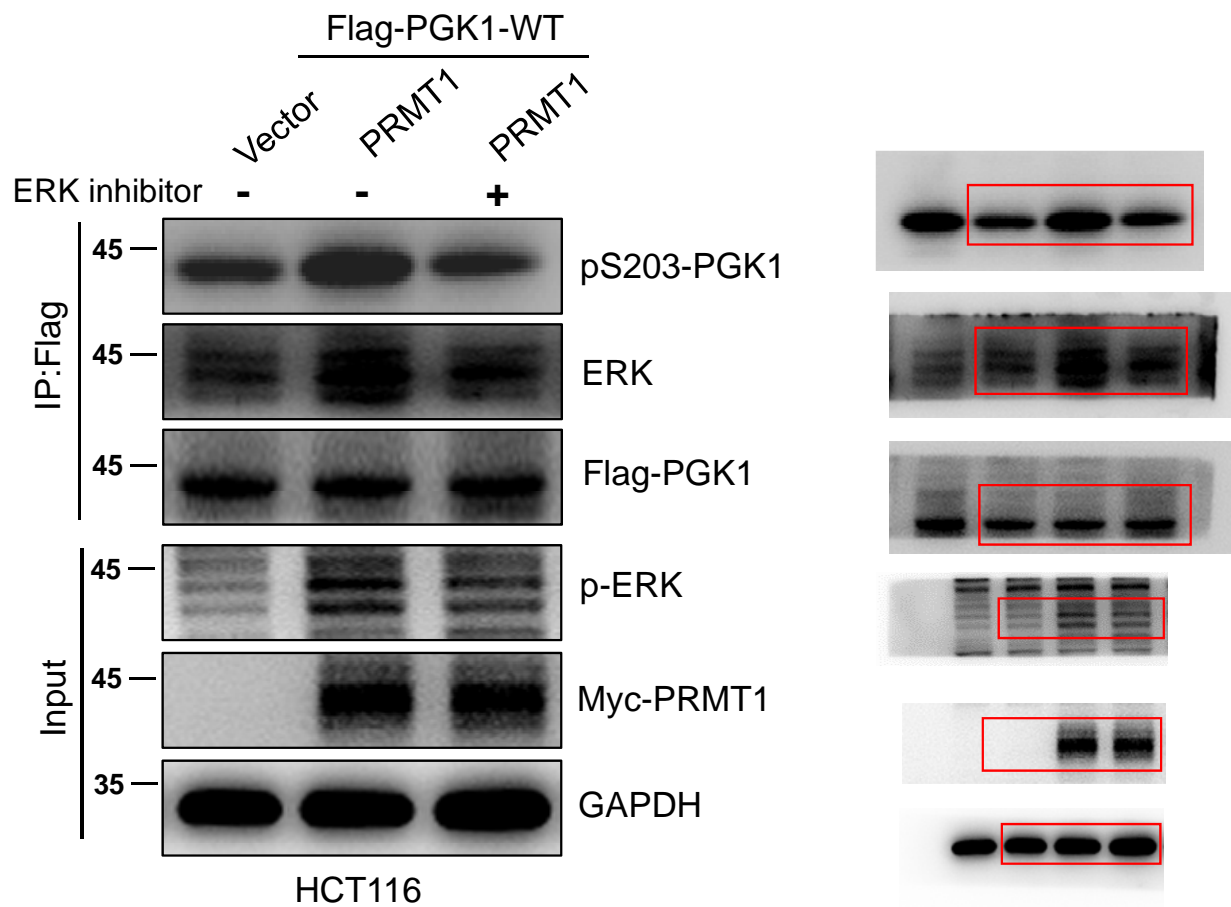

Supplementary Figure 2

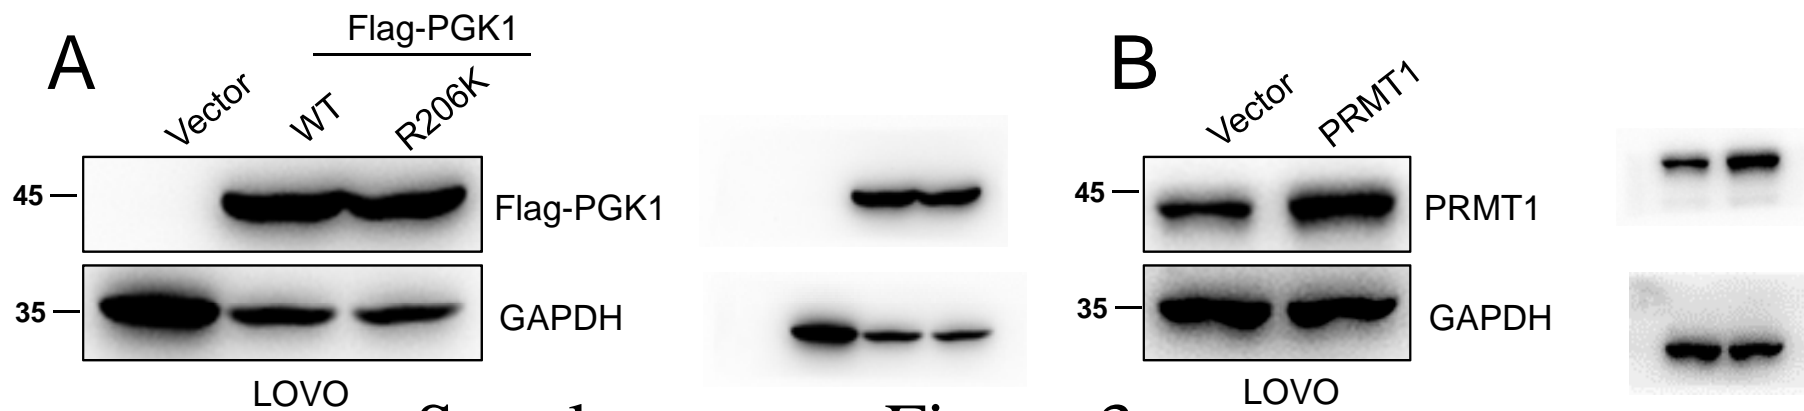

Supplementary Figure 3
